# Supplementary material for: Control of Expression of Key Cell Cycle Enzymes Drives Cell Line-Specific Functions of CDK7 in Human PDAC Cells
Source: MDPI journal article supplement (doi:10.3390/ijms23020812), 2022-01-12
Supplement: s1 [file s1]

## Supplementary Figures

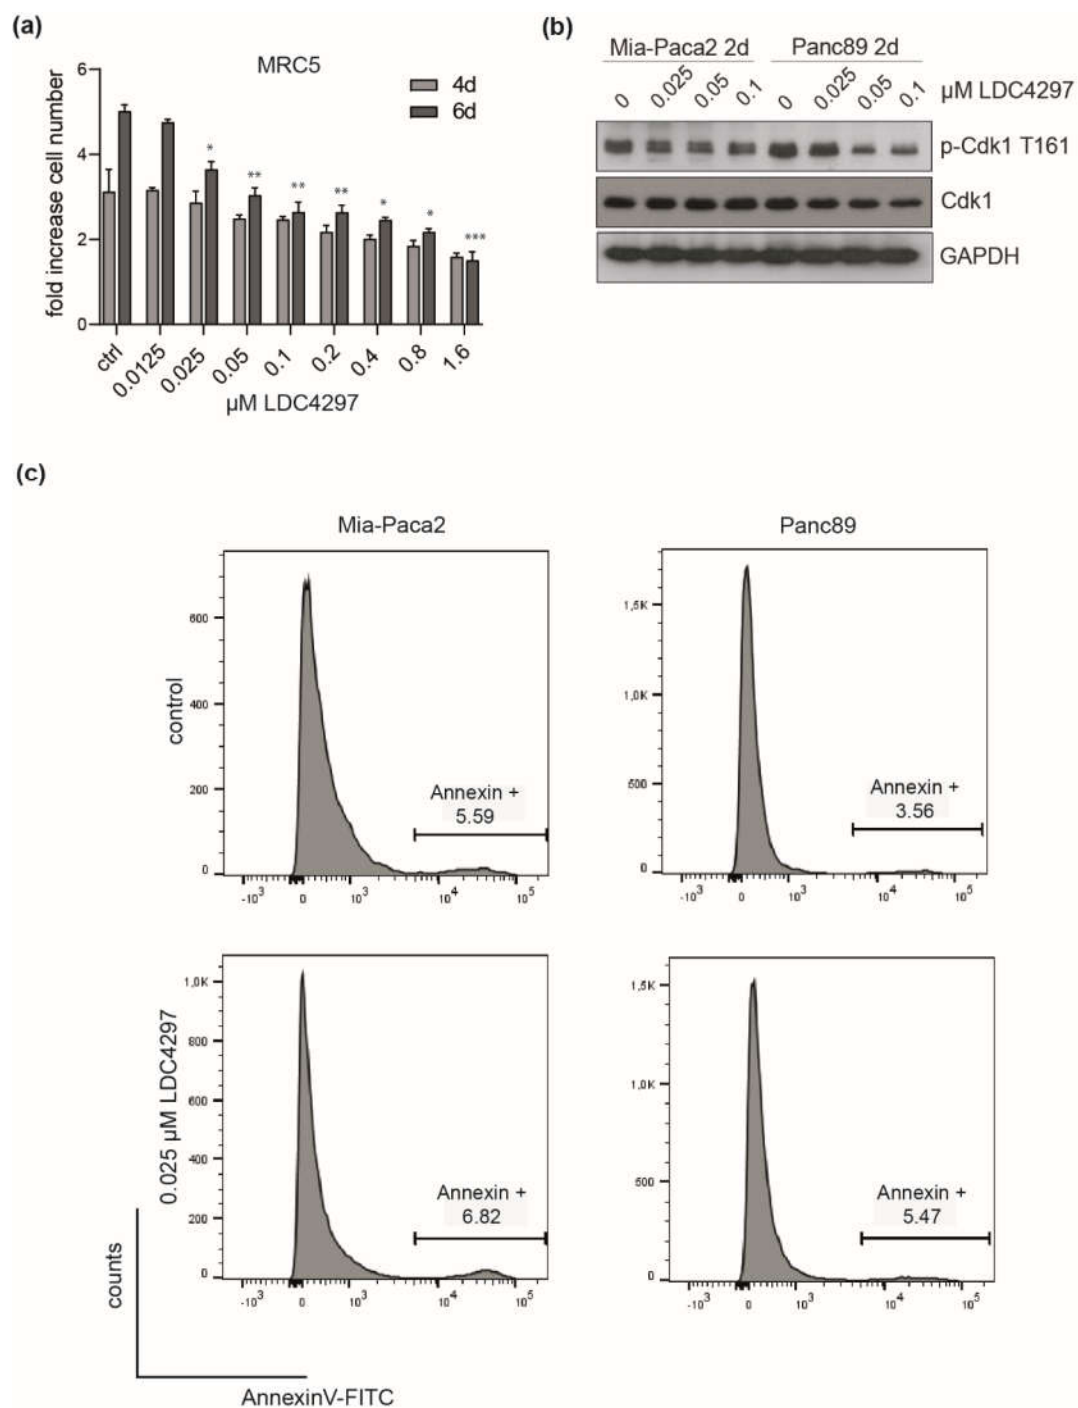

**Supplementary Figure S1:** (a) MRC5 cells were treated with the indicated concentrations of LDC4297 [µM] for 4 or 6 days and cell viability analyzed ( $n = 3$ ). Significance was analyzed by two-sided Student's  $t$  test: \*  $p \leq 0.05$ ; \*\*  $p \leq 0.01$ ; \*\*\*  $p \leq 0.001$ . (b) Mia-Paca2 and Panc89 cells were treated with the indicated concentrations of LDC4297 [µM] or DMSO for 48 hours. Cell extracts were analyzed by SDS-PAGE and immunoblot using the indicated antibodies. (c) Mia-Paca2 and Panc89 cells were treated with 0,025 µM LDC4297 for 4 days. Cells were stained with Annexin V-FITC and analyzed by FACS.

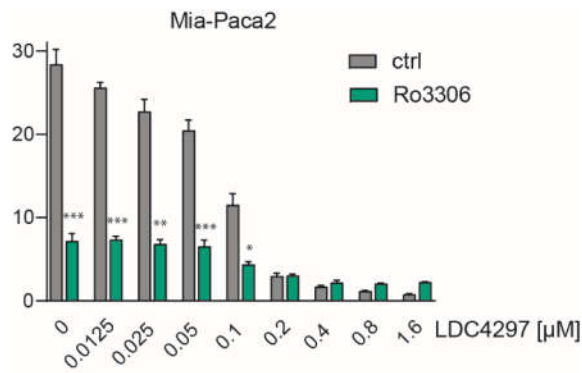

**Supplementary Figure S2:** Mia-Paca2 cells were treated with increasing concentrations of LDC4297 [μM] in the absence or presence of 2 μM Ro-3306 and cell viability determined ( $n = 3$ ). Significance was analyzed by two-sided Student's t test: \*  $p \leq 0.05$ ; \*\*  $p \leq 0.01$ ; \*\*\*  $p \leq 0.001$

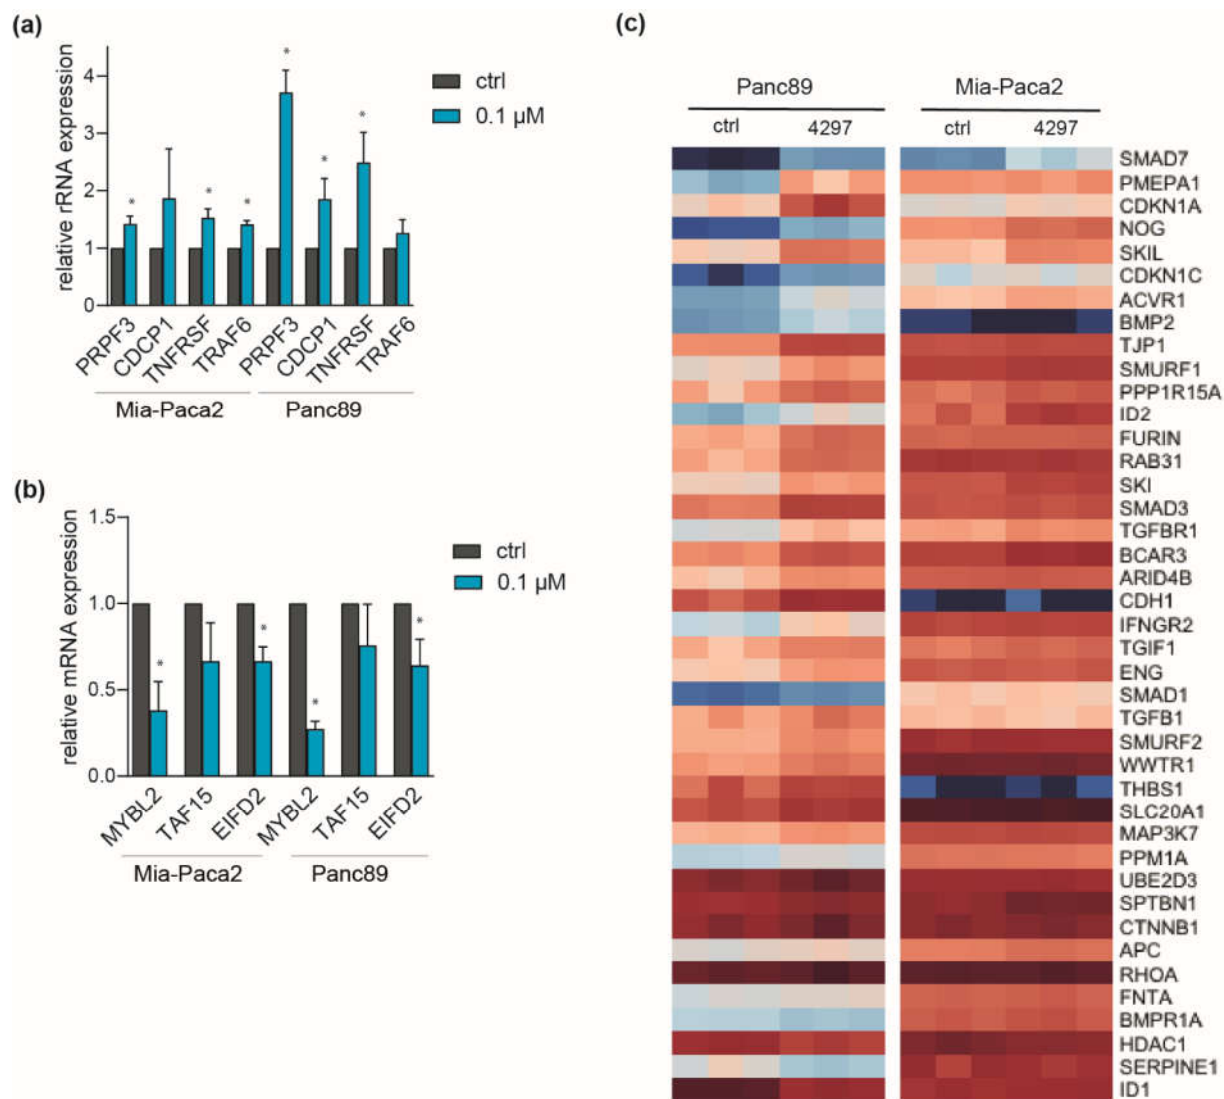

**Supplementary Figure S3:** (a, b) Mia-Paca2 and Panc89 cells were treated with 0.1  $\mu$ M LDC4297 for 3 days and mRNA expression of exemplarily chosen genes either found upregulated (a) or downregulated (b) in RNAseq analysis was analyzed by RT-qPCR ( $n = 2$ ). (c) Heatmap of TGF $\beta$  target genes from RNAseq data, which are significantly regulated in Panc89, sorted according to regulation in Panc89. Upregulation: 90% in Panc89, 37% in Mia-Paca2; Downregulation: 10% in Panc89, 2% in Mia-Paca2; 61% not significantly regulated in Mia-Paca2.

Significance was analyzed by two-sided Student's  $t$  test: \*  $p \leq 0.05$ ; \*\*  $p \leq 0.01$ ; \*\*\*  $p \leq 0.001$

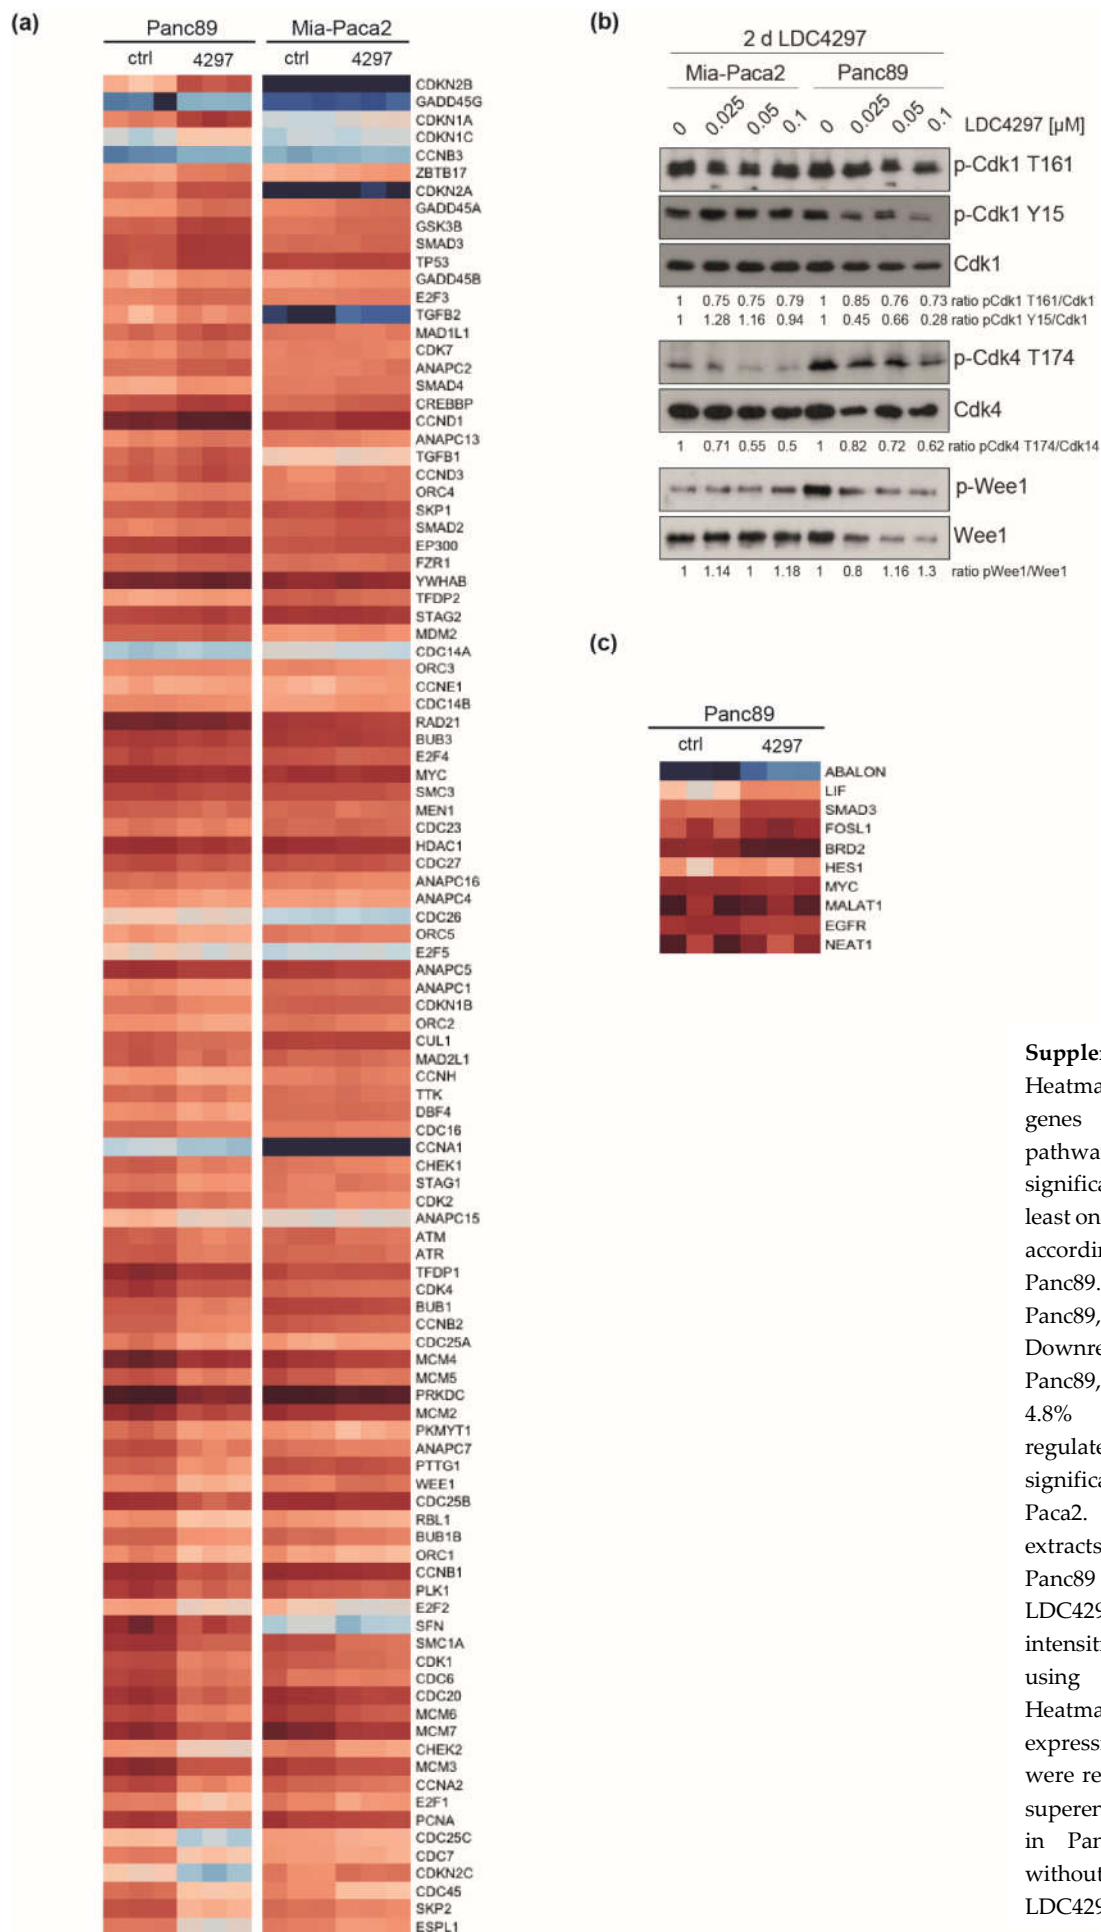

**Supplementary Figure S4:** (a) Heatmap of cell cycle related genes (KEGG cell cycle pathway), which are significantly regulated in at least one of the cell lines, sorted according to regulation in Panc89. Upregulation: 29.5% in Panc89, 17.1% in Mia-Paca2; Downregulation: 65.7% in Panc89, 44.8% in Mia-Paca2; 4.8% not significantly regulated in Panc89, 38.1% not significantly regulated in Mia-Paca2. (b) Immunoblots of extracts from Mia-Paca2 and Panc89 cells treated with LDC4297 for 2 days. Band intensities were quantified using ImageJ software. (c) Heatmap depicting the expression level of genes that were reported to be driven by superenhancers in PDAC cells in Panc89 cells with and without treatment with 0.1 μM LDC4297 for 3 days.

## Supplementary Tables

**Supplementary Table S1. Mutational status of K-Ras, p53, CDKN2A and Smad4 in human PDAC cell lines.**

| Locus                    | Cell lines                      |                  |                  |                  |                  |                                 |                         |                   |                                               |
|--------------------------|---------------------------------|------------------|------------------|------------------|------------------|---------------------------------|-------------------------|-------------------|-----------------------------------------------|
|                          | Panc89<br>[1]                   | PT45<br>[2]      | BxPc3<br>[3]     | MP2<br>[4]       | Panc1<br>[5]     | AsPc1<br>[6]                    | Capan1<br>[7]           | Capan2<br>[7]     | A8184<br>[2]                                  |
| <i>KRas</i>              | Q61H                            | G13D             | wt               | G12C             | G12D             | G12D                            | G12V                    | G12V              | G12R                                          |
| <i>p53</i>               | Y220C                           | R280K            | Y220C            | R248W            | R273H/<br>R273C  | R273H/<br>135<br>frameshi<br>ft | A159V                   | wt/<br>R273H      | mut. in<br>tetra-<br>merizati<br>on<br>domain |
| <i>CDKN2A</i>            | mut.<br>meth.                   | mut.<br>h.d.     | wt               | mut.<br>h.d.     | mut.<br>h.d.     | wt/<br>frame-<br>shift          | mut.<br>h.d.            | wt./<br>mut. ins. | mut.<br>h.d.                                  |
| <i>Smad4</i>             | wt                              | wt               | mut.<br>h.d.     | wt               | wt               | wt/<br>R100T                    | F557L                   | wt                | wt                                            |
| <b>Tissue<br/>origin</b> | lymphn<br>ode<br>metastas<br>is | primary<br>tumor | primary<br>tumor | primary<br>tumor | primary<br>tumor | ascites/<br>metastat<br>ic site | liver<br>metastas<br>is | primary<br>tumor  | ascites                                       |

Abbreviations: wt: wild-type, mut.: mutation, meth.: methylation, h.d.: homozygous deletion, ins.: insertion. Cell lines are sorted from left to right by decreasing sensitivity to LDC4297.

**Supplementary Table S2. Proliferation rates of human PDAC cell lines.**

|                      | Cell lines |        |       |               |       |       |        |        |       |
|----------------------|------------|--------|-------|---------------|-------|-------|--------|--------|-------|
|                      | Panc89     | PT45   | BxPc3 | Mia-<br>Paca2 | Panc1 | AsPc1 | Capan1 | Capan2 | A8184 |
| doubling<br>time [d] | 0.899      | 0.8233 | 1.087 | 0.9942        | 1.722 | 1.262 | 1.378  | 1.140  | 1.139 |

**Supplementary Table S3: Log2 fold changes determined from RNAseq analysis and RT-qPCR for the indicated genes**

| symbol           | Panc89<br>Log2FoldChange |       | MiaPaca2<br>Log2FoldChange |       |
|------------------|--------------------------|-------|----------------------------|-------|
|                  | RNAseq                   | qPCR  | RNAseq                     | qPCR  |
| <i>PRPF3</i>     | 1.92                     | 4.69  | 0.76                       | 1.42  |
| <i>CDCP1</i>     | 2.12                     | 1.85  | 1.20                       | 1.86  |
| <i>TNFRSF10D</i> | 2.19                     | 2.49  | 0.89                       | 1.53  |
| <i>TRAF6</i>     | 1.03                     | 1.26  | 0.54                       | 1.41  |
| <i>MYBL2</i>     | -2.58                    | -0.27 | -1.59                      | -0.38 |
| <i>TAF15</i>     | -2.28                    | -0.76 | -1.16                      | -0.66 |
| <i>EIF2D</i>     | -2.24                    | -0.64 | -1.69                      | -0.67 |

## Supplementary References

- [1] T. Okabe, N. Yamaguchi, and N. Ohsawa, "Establishment and characterization of a carcinoembryonic antigen (CEA)-producing cell line from a human carcinoma of the exocrine pancreas.," *Cancer*, vol. 51, no. 4, pp. 662–8, Feb. 1983.
- [2] P. S. Moore *et al.*, "Genetic profile of 22 pancreatic carcinoma cell lines. Analysis of K-ras, p53, p16 and DPC4/Smad4.," *Virchows Arch.*, vol. 439, no. 6, pp. 798–802, Dec. 2001.
- [3] M. H. Tan *et al.*, "Characterization of a new primary human pancreatic tumor line.," *Cancer Invest.*, vol. 4, no. 1, pp. 15–23, 1986.
- [4] A. A. Yunis, G. K. Arimura, and D. J. Russin, "Human pancreatic carcinoma (MIA PaCa-2) in continuous culture: sensitivity to asparaginase.," *Int. J. cancer*, vol. 19, no. 1, pp. 128–35, Jan. 1977.
- [5] M. Lieber, J. Mazzetta, W. Nelson-Rees, M. Kaplan, and G. Todaro, "Establishment of a continuous tumor-cell line (panc-1) from a human carcinoma of the exocrine pancreas.," *Int. J. cancer*, vol. 15, no. 5, pp. 741–7, May 1975.
- [6] W. H. Chen *et al.*, "Human pancreatic adenocarcinoma: in vitro and in vivo morphology of a new tumor line established from ascites.," *In Vitro*, vol. 18, no. 1, pp. 24–34, Jan. 1982.
- [7] B. Sipos, S. Möser, H. Kalthoff, V. Török, M. Löhr, and G. Klöppel, "A comprehensive characterization of pancreatic ductal carcinoma cell lines: towards the establishment of an in vitro research platform," *Virchows Arch.*, vol. 442, no. 5, pp. 444–452, May 2003.
